# Supplementary material
Source: PubMed Central journal article supplement (PMC3234868)
Supplement: supp_M111.296830_SI.pdf [file supp_M111.296830_SI.pdf]

## Supplemental Information

Assembly of the preactivation complex for urease maturation in *Helicobacter pylori*: Crystal Structure of the UreF/UreH complex

**Yu Hang Fong<sup>1</sup>, Ho Chun Wong<sup>1</sup>, Chi Pang Chuck<sup>1</sup>, Yu Wai Chen<sup>2</sup>, Hongzhe Sun<sup>3</sup> and Kam-Bo Wong<sup>1</sup>**

<sup>1</sup>Centre for Protein Science and Crystallography, School of Life Sciences, Chinese University of Hong Kong, Hong Kong

<sup>2</sup>King's College London, Randall Division of Cell and Molecular Biophysics, London, UK.

<sup>3</sup>Department of Chemistry, University of Hong Kong, Hong Kong

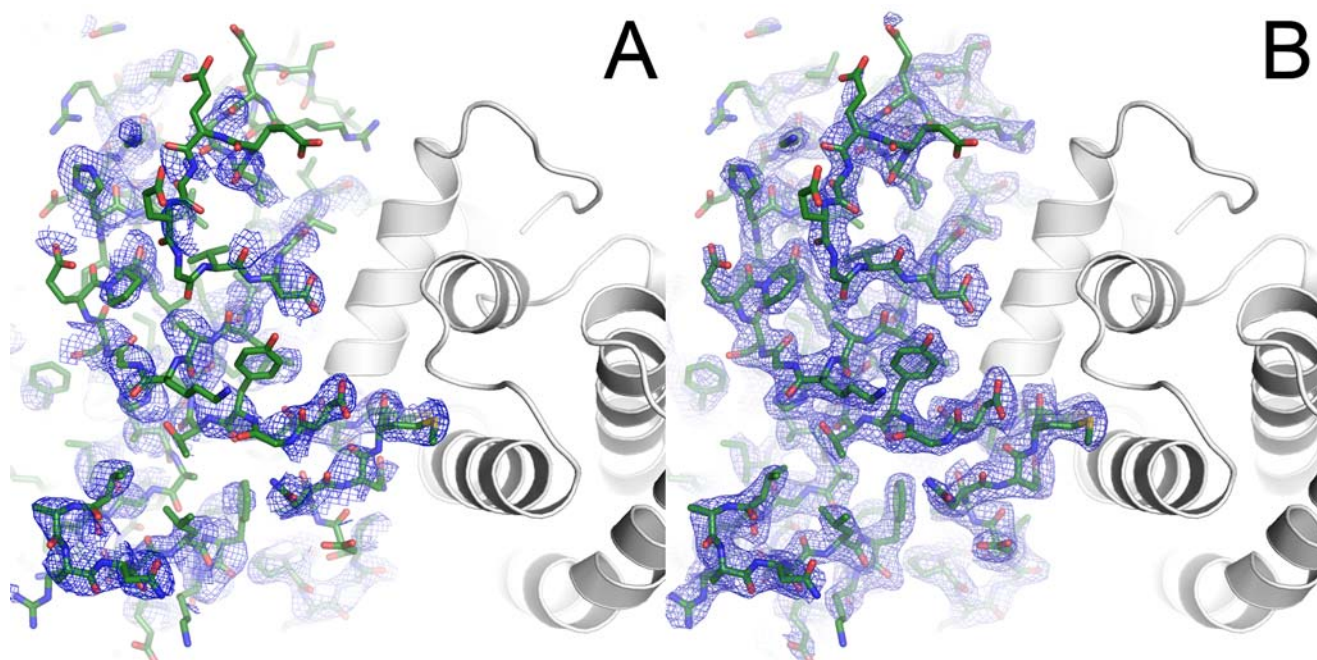

**Figure S1. The 2Fo-Fc electron density map of UreH after density modification and model building.** (A) After an initial molecular replacement solution was found using UreF (white) as search model, the electron density was improved by density modification. The resulting 2Fo-Fc electron density map is shown contoured at 1.0  $\sigma$ . Clear electron density of the UreH (green) chain is observed. (B) 2Fo-Fc electron density map of UreH after model building is completed is shown contoured at 1.0  $\sigma$ .

# Crystal structure of Helicobacter pylori UreF/UreH complex

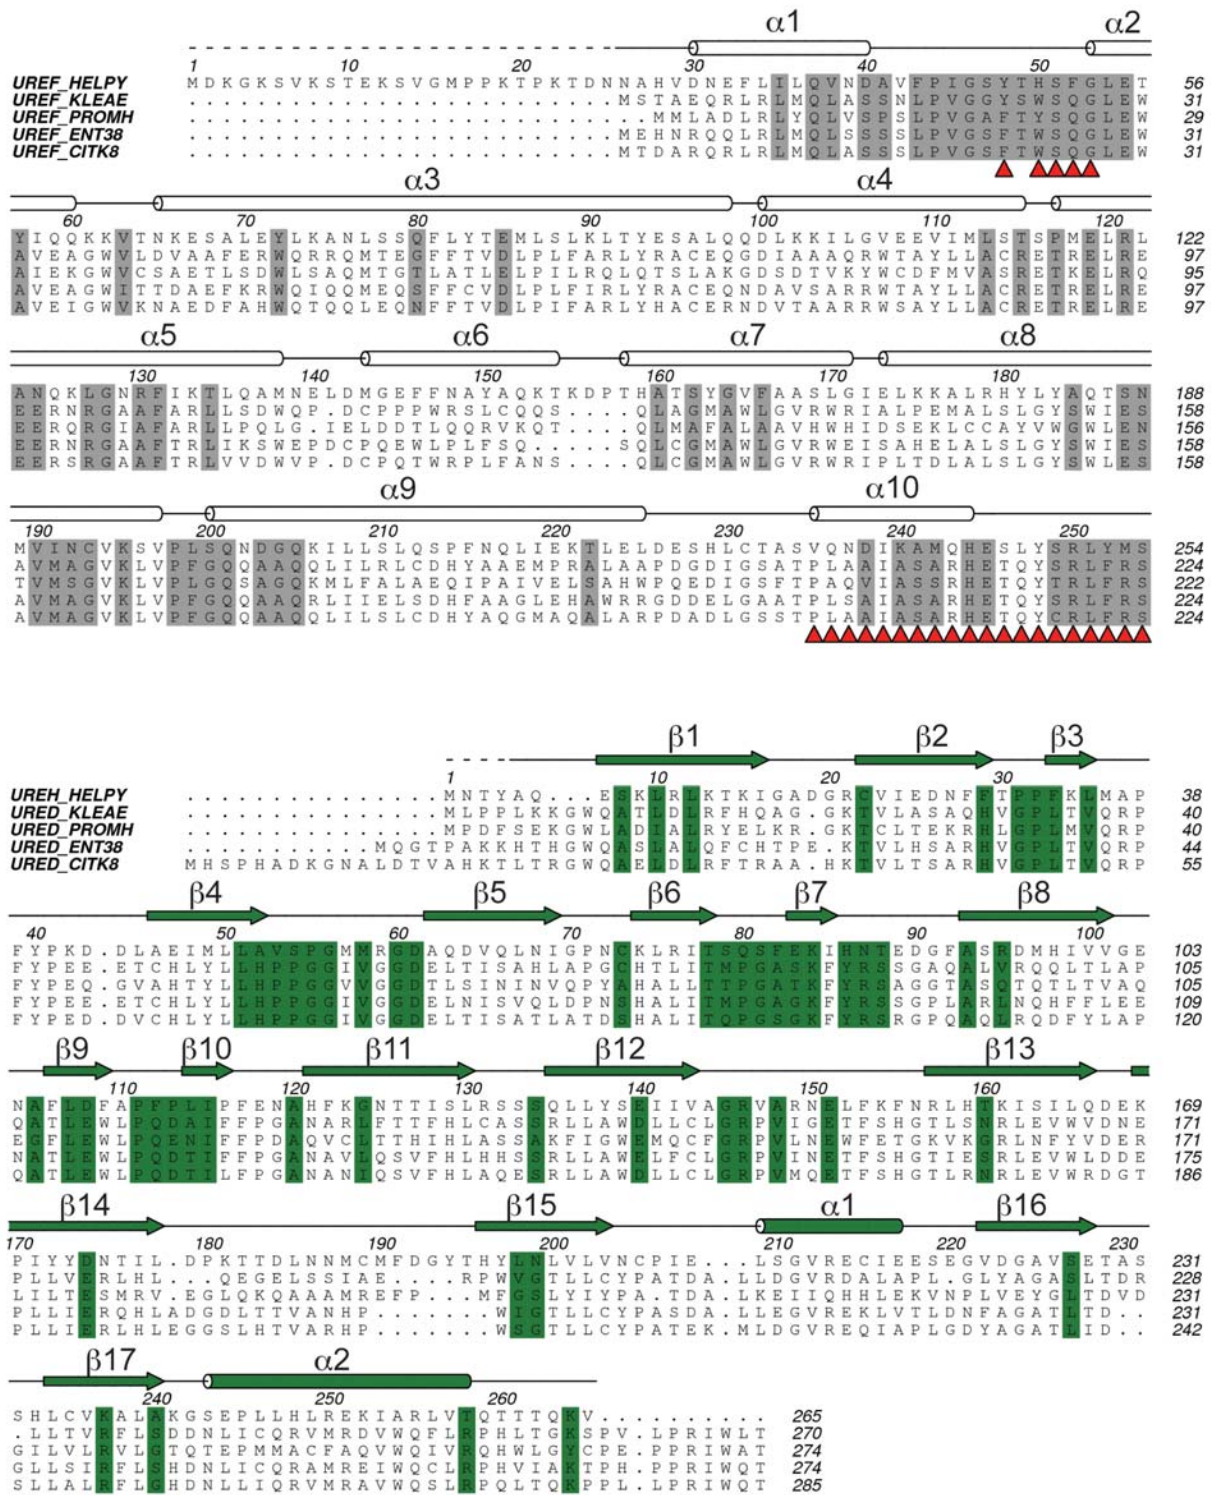

**Figure S2. The sequence alignment of UreF and UreH(D).** Sequences of UreF and UreH(D) from Swiss-Prot database were aligned using the program MUSCLE (1). The multiple sequence alignment obtained was used to calculate the conservation scores using the CONSURF server (2). Protein sequences from 5 selected species are shown (*Helicobacter pylori* – HELPHY; *Klebsiella aerogenes* – KLEAE; *Proteus mirabilis* – PROMH; *Enterobacter sp.* strain 638 – ENT38; *Citrobacter koseri* – CITK8). α-helices and β-strands of *H. pylori* UreF and UreH are indicated as cylinders and arrows, respectively. Residues with conservation scores 8-9 are highlighted. Residues of UreF involved in conformational changes are marked with red triangles.

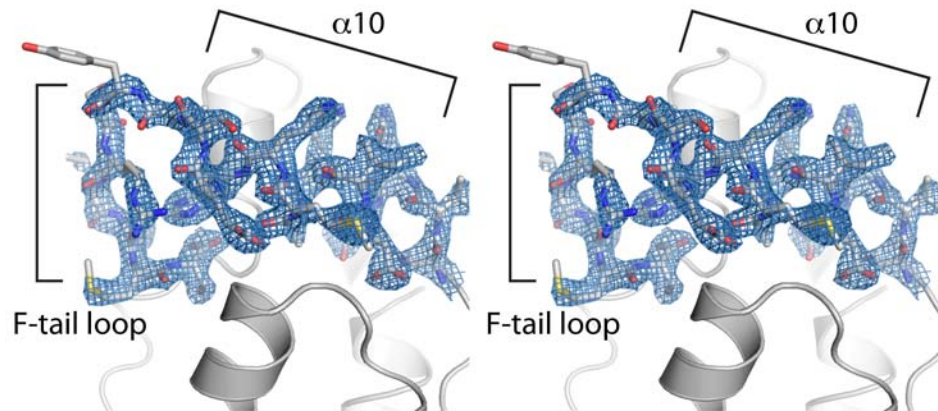

**Figure S3. The C-terminal residues of UreF become ordered upon complex with UreH.** An sigma-weighted 2Fo-Fc electron density map complex is contoured at  $1.5\sigma$  for residues S234<sup>UreF</sup>-S254<sup>UreF</sup> of the UreF/UreH complex. These residues form an extra helix  $\alpha 10$  (236-243) and the F-tail loop structure (244-254). Note that these C-terminal residues are missing in the crystal structure of the free form of UreF.

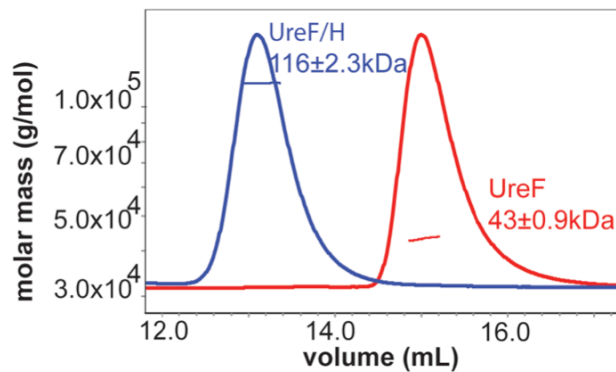

**Figure S4. Determination of solution oligomerization state of UreF and UreF/UreH complex.** Purified samples of UreF and UreF/UreH complex were loaded to a Superdex 200 analytical gel filtration column pre-equilibrated with phosphate buffer saline, and analyzed by static light scattering. Both UreF and UreF/UreH were eluted as single peaks. The molecular weights of UreF and the UreF/UreH complex were  $43 \pm 0.9 \text{ kDa}$  and  $116 \pm 2.3 \text{ kDa}$ , respectively.

**Table S1. Data collection, phasing and refinement statistics for UreF<sup>a</sup>**

|                                               | Native<br>(PDB Code: 3O1Q)        | SeMet                          |                           |                           |
|-----------------------------------------------|-----------------------------------|--------------------------------|---------------------------|---------------------------|
|                                               |                                   | Peak                           | Inflection                | Remote                    |
| Space Group                                   | C2                                | C2                             |                           |                           |
| Unit Cell Parameters<br>(a, b, c, $\beta$ )   | 135.3 Å, 90.0 Å,<br>67.0 Å, 94.6° | 134.7 Å, 89.0 Å, 65.7 Å, 93.9° |                           |                           |
| Wavelength (Å)                                | 1.54187                           | 0.98080                        | 0.98100                   | 0.97040                   |
| Resolution (Å)                                | 50.95-1.85<br>(1.95-1.85)         | 40.11-2.28<br>(2.55-2.28)      | 40.11-2.41<br>(2.55-2.41) | 40.11-2.41<br>(2.55-2.41) |
| No. of unique reflections                     | 68238 (9897)                      | 33836 (4605)                   | 26725 (1604)              | 26707 (1629)              |
| Redundancy                                    | 4.6 (4.5)                         | 10.3 (9.7)                     | 3.9 (3.6)                 | 3.8 (3.8)                 |
| Completeness (%)                              | 100 (100)                         | 96.1 (89.8)                    | 99.4 (98.3)               | 99.3 (99.5)               |
| Mosaicity (°)                                 | 0.35                              | 1.85                           | 1.31                      | 1.35                      |
| Average I/s                                   | 9.9 (3.9)                         | 22.7 (8.0)                     | 10.2 (3.4)                | 9.3 (3.6)                 |
| R <sub>merge</sub>                            | 0.103 (0.334)                     | 0.072 (0.249)                  | 0.088 (0.309)             | 0.088 (0.289)             |
| Figure of Merit                               | —                                 | 0.496                          |                           |                           |
| R <sub>work</sub>                             | 0.169 (0.183)                     |                                |                           |                           |
| R <sub>free</sub>                             | 0.208 (0.218)                     |                                |                           |                           |
| Average B-factor (Å <sup>2</sup> )            | 24.5                              |                                |                           |                           |
| R.m.s. deviation bond:                        |                                   |                                |                           |                           |
| bond lengths (Å)                              | 0.006                             |                                |                           |                           |
| angles (°)                                    | 0.926                             |                                |                           |                           |
| Ramachandran analysis:                        |                                   |                                |                           |                           |
| preferred regions (%)                         | 98.6                              |                                |                           |                           |
| allowed regions (%)                           | 100                               |                                |                           |                           |
| Diffraction Precision Index (Å <sup>2</sup> ) | 0.1109                            |                                |                           |                           |

<sup>a</sup> Values in parentheses correspond to the highest resolution shell.

**Table S2. Summary of hydrogen bonds and salt bridges between UreF and UreH generated using PISA(3)**

## Hydrogen Bonds

|    | UreF          | UreH          | Distance [Å] |
|----|---------------|---------------|--------------|
| 1  | ALA 233[ N ]  | ASN 175[ O ]  | 2.82         |
| 2  | TYR 57[ OH ]  | MET 188[ O ]  | 2.8          |
| 3  | VAL 235[ N ]  | CYS 189[ O ]  | 3.3          |
| 4  | ASN 237[ N ]  | CYS 189[ O ]  | 3.03         |
| 5  | GLN 236[ N ]  | CYS 189[ O ]  | 3.17         |
| 6  | ASN 237[ ND2] | CYS 189[ SG ] | 3.63         |
| 7  | GLN 236[ N ]  | MET 190[ O ]  | 2.8          |
| 8  | GLN 236[ NE2] | ASP 192[ OD2] | 2.71         |
| 9  | LYS 62[ NZ ]  | ASP 192[ OD2] | 3.05         |
| 10 | GLN 243[ NE2] | ASP 223[ OD1] | 2.92         |
| 11 | GLN 236[ NE2] | ASP 223[ OD2] | 2.99         |
| 12 | LYS 240[ NZ ] | ASP 223[ OD2] | 2.81         |
| 13 | GLN 243[ NE2] | GLY 224[ O ]  | 2.85         |
| 14 | MET 118[ N ]  | SER 227[ OG ] | 2.97         |
| 15 | ARG 121[ NH2] | GLU 228[ O ]  | 2.53         |
| 16 | LEU 113[ O ]  | TYR 173[ N ]  | 3.19         |
| 17 | SER 228[ O ]  | ASN 175[ ND2] | 3.04         |
| 18 | LEU 230[ O ]  | ASN 175[ ND2] | 3.22         |
| 19 | GLU 245[ OE1] | ARG 213[ NH2] | 3.45         |
| 20 | SER 116[ O ]  | SER 227[ OG ] | 3.48         |
| 21 | GLU 245[ OE2] | SER 227[ OG ] | 2.78         |
| 22 | SER 234[ O ]  | LYS 237[ NZ ] | 3.15         |

## Salt Bridges

|   | UreF          | UreH          | Distance [Å] |
|---|---------------|---------------|--------------|
| 1 | LYS 62[ NZ ]  | ASP 192[ OD2] | 3.05         |
| 2 | LYS 240[ NZ ] | ASP 223[ OD1] | 3.31         |
| 3 | LYS 240[ NZ ] | ASP 223[ OD2] | 2.81         |
| 4 | GLU 245[ OE1] | ARG 213[ NH2] | 3.45         |
| 5 | ASP 238[ OD2] | LYS 237[ NZ ] | 3.11         |

**REFERENCES**

1. Edgar, R. C. (2004) *Nucleic Acids Res.* **32**, 1792-1797
2. Landau, M., Mayrose, I., Rosenberg, Y., Glaser, F., Martz, E., Pupko, T., and Ben-Tal, N. (2005) *Nucleic Acids Res.* **33**, W299-302
3. Krissinel, E., and Henrick, K. (2007) *J. Mol. Biol.* **372**, 774-797
